# Supplementary material for: The Chaperone and Redox Properties of CnoX Chaperedoxins Are Tailored to the Proteostatic Needs of Bacterial Species
Source: PubMed Central journal article supplement (PMC6282202; doi:10.1128/mbio.01541-18), 2018-11-27
Supplement: mbo006184194s2.pdf [file mbo006184194s2.pdf]

### *Isolation of aggregated proteins*

Cells were grown in PYE broth (containing 0.2% Bacto Peptone, 0.1% yeast extract, 1 mM MgSO<sub>4</sub>, and 0.5 mM CaCl<sub>2</sub>) until OD<sub>660 nm</sub>=0.5 and then stressed for 30 min at 42 °C. Cells were cooled on ice for 15 min and centrifuged at 5000 x g for 10 min at 4 °C. Pellets were resuspended in 120 µL of fresh fractionation buffer (10 mM KPi [pH 6.5], 1 mM EDTA, 20% sucrose, and 1 mg/mL lysozyme) and kept on ice for 30 min. Buffer B (1080 µL; 10 mM KPi [pH 6.5], 1 mM EDTA) was added to the sample before sonication. Cells were centrifuged at 2000 x g for 15 min at 4 °C to remove intact cells. The supernatant was transferred into a clean tube and centrifuged at 14,000 x g for 20 min. The pellet was kept and frozen at -80 °C and stored overnight. The next day, pellets were resuspended in 1 mL of buffer B and briefly sonicated before being centrifuged at 14,000 x g for 20 min at 4 °C. The pellet was washed with 960 µL of buffer B and 240 µL of 10% NP40 detergent and centrifuged at 14,000 x g for 30 min at 4 °C. The washing step was repeated a second time. Finally, the clean pellet was precipitated with TCA and dried for mass spectrometry.
