# Supplementary material for: The Chaperone and Redox Properties of CnoX Chaperedoxins Are Tailored to the Proteostatic Needs of Bacterial Species
Source: PubMed Central journal article supplement (PMC6282202; doi:10.1128/mbio.01541-18), 2018-11-27
Supplement: mbo006184194s4.pdf [file mbo006184194s4.pdf]

### *Complementation assays*

The *cctrx1* knock-out strain was constructed using a two-step recombination method. The upstream and downstream regions of *cctrx1* were amplified (upstream: 5'-gaggatatctggccatggccagcgcggtttg-3' and 5'-ctcgctagccgcaacgggtgctcatggctgctc-3'; downstream: 5'-gaggctagcggcggtccaggccgctaagcggc-3' and 5'-ctctccggatccagctggagccggccc-3') from CB15N chromosomal DNA and cloned together into pNPTS138, to create an in-frame deletion. This plasmid was transformed into *C. crescentus* via electroporation, plated on PYE-Kan (final kanamycin concentration, 20 µg/mL) to select for plasmid integration, and incubated at 30 °C for 2 days. Several integrants were inoculated into PYE (0.2% w/v Bacto Peptone- BD Biosciences, 0.1% w/v yeast extract- BD Biosciences, 1 mM MgSO<sub>4</sub>, and 0.5 mM CaCl<sub>2</sub>) and grown at 30 °C to allow the second recombination to occur. Cells were plated on PYE containing 3% sucrose to select for cells that lost the plasmid (*sacB* counter-selection). Plates were incubated at 30 °C for 2 days. The resulting clones were patched onto PYE and PYE-Kan plates to select clones that lost the plasmid, not the ones with an inactivated copy of *sacB*. The knock-out construct was verified with PCR using primers (5'-gaggatatctggccatggccagcgcggtttg-3' and 5'-ctctccggatccagctggagccggccc -3') upstream and downstream of *cctrx1*.
