# Supplementary material for: The Chaperone and Redox Properties of CnoX Chaperedoxins Are Tailored to the Proteostatic Needs of Bacterial Species
Source: PubMed Central journal article supplement (PMC6282202; doi:10.1128/mbio.01541-18), 2018-11-27
Supplement: mbo006184194sf1.pdf [file mbo006184194sf1.pdf]

**Figure S1- Phylogenetic analysis of *CcCnoX***

*CnoX* is well conserved among Gram-negative bacteria. This figure shows a schematic of the unrooted Bayesian phylogenetic tree for *CcCnoX*.

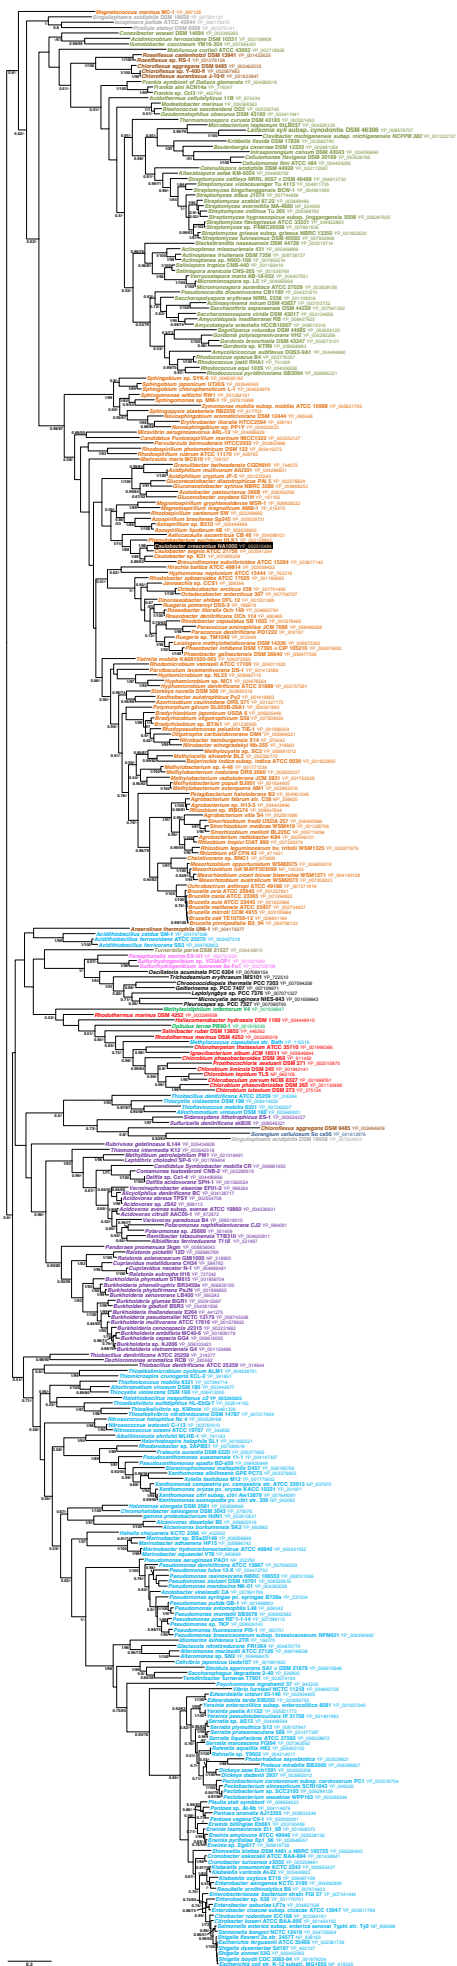

- Alphaproteobacteria
- Betaproteobacteria
- Gammaproteobacteria
- Chlamydiales
- Cyanobacteria
- Firmicutes
- Actinobacteria
- Chloroflexi
- Planctomycetes
- Thaumarchaeota
- Archaea
- Eukaryota
