# Supplementary material for: The Chaperone and Redox Properties of CnoX Chaperedoxins Are Tailored to the Proteostatic Needs of Bacterial Species
Source: PubMed Central journal article supplement (PMC6282202; doi:10.1128/mbio.01541-18), 2018-11-27

### Figure S2- Holdase experiment in triplicate

**A** *CcCnoX* inhibits the aggregation of thermally (43°C) denatured CS (blue, 16:1; orange, 8:1), as measured by light scattering at 360 nm. CS alone is shown in black. This figure shows additional experiments to Figure 4. **B** HOCl-treated *CcCnoX* inhibits the aggregation of thermally (43°C) denatured CS (orange, 0.5:1; blue, 1:1), as measured by light scattering at 360 nm. CS alone is shown in black. This figure shows additional experiments to Figure 4

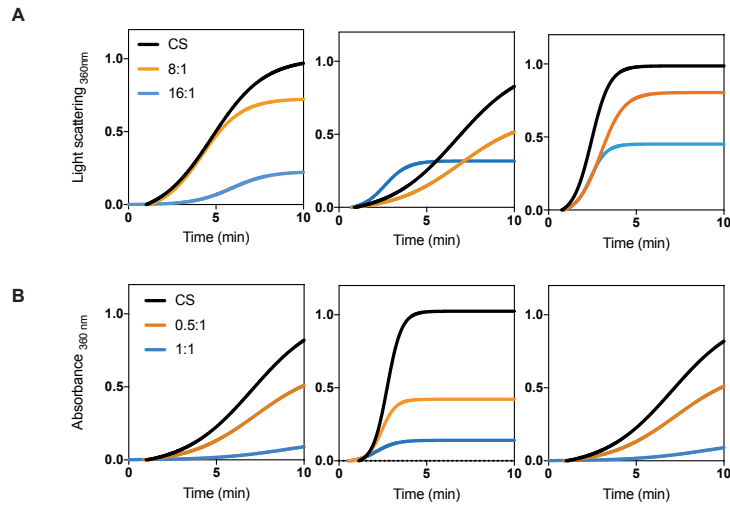

Supplement: mbo006184194sf2.pdf [file mbo006184194sf2.pdf]
