# Supplementary material for: The Chaperone and Redox Properties of CnoX Chaperedoxins Are Tailored to the Proteostatic Needs of Bacterial Species
Source: PubMed Central journal article supplement (PMC6282202; doi:10.1128/mbio.01541-18), 2018-11-27
Supplement: mbo006184194st1.pdf [file mbo006184194st1.pdf]

**Table S1- Substrates of CcCnoX**

This table shows a list of substrates of *CcCnoX* either identified by aggregation assay or thiol-trapping assay. The “aggregates” column refers to the fold abundance for a given protein in the aggregation fraction of a  $\Delta cccnoX$  compared to WT in the aggregation assay. If the protein was only detected in the absence of *CcCnoX*, it is marked as  $\Delta cccnoX$ . Proteins identified by thiol-trapping are marked with a X in the “trapping” column and the spot number in which the protein has been identified is indicated for each separate experiment. Proteins that are also known substrates of DnaK in *E. coli*<sup>1</sup> are marked by a X in the “DnaK” column; Known substrates of *E. coli* GroEL are marked according to Kerner *et al.* classification<sup>2</sup> in the “GroEL” column and known substrates of *E. coli* Trx1<sup>3</sup> in the “Trx1” column.

| CCNA  | Accession | Description                                                      | Aggregates | Trapping | Exp1 Spot # | Exp2 Spot # | Exp3 Spot # | DnaK | GroEL   | Trx 1 |
|-------|-----------|------------------------------------------------------------------|------------|----------|-------------|-------------|-------------|------|---------|-------|
| 01651 | B8GVE6    | DNA gyrase subunit A                                             | 2.8        | X        | 1           | /           | 1           |      | II      |       |
| 01689 | B8GVI4    | Inosine-5'-monophosphate dehydrogenase                           | 3          |          |             |             |             | X    |         |       |
| 01692 | B8GVI7    | GMP synthase [glutamine-hydrolyzing]                             | 2.3        |          |             |             |             | X    |         |       |
| 03770 | B8GVT2    | Malate dehydrogenase                                             |            | X        | /           | 3           | 2           | X    |         | X     |
| 03781 | B8GVU3    | Aconitate hydratase                                              |            | X        | 1           | 7           | 2           |      |         |       |
| 03833 | B8GVZ5    | Enoyl-[acyl-carrier-protein] reductase [NADH]                    |            | X        | 2           | 3           | /           | X    |         |       |
| 03835 | B8GVZ7    | 3-oxoacyl-(Acyl-carrier-protein) synthase                        |            | X        | 1           | 3           | /           |      | I       | X     |
| 03842 | B8GW04    | Molybdopterin biosynthesis protein MoeB                          |            | X        | 3           | /           | 7           | X    |         |       |
| 03871 | B8GW33    | tRNA uridine 5-carboxymethylaminomethyl modification enzyme MnmG |            | X        | 7           | /           | 7           |      |         |       |
| 03873 | B8GW35    | Putative uncharacterized protein                                 |            | X        | 1           | 5           | /           |      |         |       |
| 03876 | B8GW38    | Transcription termination factor Rho                             | 2.5        |          |             |             |             |      | II      | X     |
| 01776 | B8GW49    | Ribonuclease D                                                   | 4          |          |             |             |             |      |         |       |
| 01795 | B8GW68    | Enolase                                                          | 3.1        | X        | 3           | 5           | /           | X    | I       |       |
| 01799 | B8GW72    | Pyruvate dehydrogenase E1 component alpha subunit                |            | X        | 2           | /           | 8           | X    | I       |       |
| 01803 | B8GW76    | dihydrolipoamide acetyltransferase component                     | 3          | X        | 3           | 5           | 2           | X    | I       |       |
| 01805 | B8GW78    | Dihydrolipoamide dehydrogenase                                   | 2.3        | X        | 1           | 3           | /           |      | I or II | X     |
| 02220 | B8GWA5    | Beta-glucosidase                                                 |            | X        | 3           | 3           | /           |      |         |       |

|       |        |                                                            |                |   |   |   |   |   |    |   |
|-------|--------|------------------------------------------------------------|----------------|---|---|---|---|---|----|---|
| 01858 | B8GWD1 | Transcriptional regulator, AraC family                     |                | X | 3 | 7 | / | X |    |   |
| 01943 | B8GWL6 | Alpha/beta hydrolase                                       |                | X | 4 | 7 | / |   |    |   |
| 01954 | B8GWM7 | Ribonuclease E                                             | <i>ΔcccnoX</i> |   |   |   |   |   |    |   |
| 01957 | B8GWN0 | Thiazole biosynthesis protein                              |                | X | 3 | 5 | / |   | I  |   |
| 01961 | B8GWN4 | Biotin carboxylase                                         | <i>ΔcccnoX</i> |   |   |   |   |   | II | X |
| 01969 | B8GWP2 | Aspartate--tRNA ligase                                     | 4              |   |   |   |   | X |    |   |
| 02000 | B8GWS3 | 30S ribosomal protein S2                                   |                | X | 2 | 5 | 8 |   | ns | X |
| 02003 | B8GWS6 | DNA polymerase III subunit alpha                           |                | X | 3 | / | 1 | X |    |   |
| 02008 | B8GWT1 | Proline--tRNA ligase                                       | <i>ΔcccnoX</i> |   |   |   |   | X |    |   |
| 00010 | B8GWW7 | Chaperone protein DnaK                                     |                | X | 3 | 1 | 5 |   | II |   |
| 00041 | B8GWZ8 | Translation initiation factor IF-2                         | 4.8            |   |   |   |   | X | II |   |
| 02042 | B8GX17 | Trigger factor                                             | 2.3            |   |   |   |   | X | I  |   |
| 02047 | B8GX22 | Glutamine synthetase                                       | 2.5            |   |   |   |   | X |    | X |
| 02050 | B8GX25 | Dihydroorotase                                             |                | X | 8 | / | 4 | X | II |   |
| 02090 | B8GX65 | Exodeoxyribonuclease III                                   |                | X | 3 | 5 | 1 |   |    |   |
| 02134 | B8GXA9 | Phosphogluconate dehydratase                               |                | X | 1 | 5 | / |   |    | X |
| 00074 | B8GXG5 | Multifunctional fatty acid oxidation complex subunit alpha | 3              |   |   |   |   |   |    |   |
| 00086 | B8GXH7 | NAD-specific glutamate dehydrogenase                       | 7.2            | X | 1 | / | 8 |   |    |   |
| 00128 | B8GXL9 | Argininosuccinate synthase                                 | <i>ΔcccnoX</i> |   |   |   |   | X |    |   |
| 00159 | B8GXQ0 | DNA gyrase subunit B                                       | 3.75           |   |   |   |   |   |    |   |
| 02231 | B8GXY9 | ABC transporter ATP-binding protein                        | 8              |   |   |   |   |   |    |   |
| 02271 | B8GY29 | Putative uncharacterized protein                           |                | X | 2 | / | 3 |   |    |   |
| 00196 | B8GY66 | 3-isopropylmalate dehydratase large subunit                |                | X | / | 5 | 7 |   |    |   |
| 00215 | B8GY85 | Putative cytosolic protein                                 |                | X | 3 | / | 8 |   |    |   |
| 00250 | B8GYC0 | Poly(3-hydroxyalkanoate) depolymerase                      | <i>ΔcccnoX</i> |   |   |   |   |   |    |   |
| 00280 | B8GYF0 | tRNA pseudouridine synthase A                              |                | X | 3 | 6 | / |   | ns |   |
| 02362 | B8GYQ4 | GAF domain-containing protein                              |                | X | 7 | / | 6 |   |    |   |
| 02419 | B8GYW1 | TonB1 protein                                              | <i>ΔcccnoX</i> |   |   |   |   |   |    |   |

|       |        |                                                                       |                |   |   |   |   |   |  |      |
|-------|--------|-----------------------------------------------------------------------|----------------|---|---|---|---|---|--|------|
| 00323 | B8GYX4 | Low-affinity zinc transport protein                                   | 3              | X | 1 | 1 | 1 |   |  |      |
| 00327 | B8GYX8 | Nitrobenzoate nitroreductase                                          |                | X | 2 | 5 | / |   |  |      |
| 00340 | B8GYZ1 | Succinyl-CoA ligase [ADP-forming] subunit beta                        | 2.8            |   |   |   |   |   |  | X    |
| 00341 | B8GYZ2 | Succinyl-CoA ligase [ADP-forming] subunit alpha                       |                | X | 3 | 3 | 8 |   |  | X    |
| 00342 | B8GYZ3 | 2-oxoglutarate dehydrogenase E1 component                             | 5.5            |   |   |   |   |   |  | II   |
| 00370 | B8GZ21 | ATP synthase subunit b                                                | 3              |   |   |   |   | X |  |      |
| 00398 | B8GZ49 | Putative uncharacterized protein                                      |                | X | 2 | 5 | 1 |   |  |      |
| 00423 | B8GZ74 | Phosphohydrolase, MutT-nudix family                                   |                | X | 2 | 5 | / |   |  |      |
| 02553 | B8GZM9 | ATP-dependent clp protease ATP-binding subunit ClpA                   | <i>ΔcccnoX</i> |   |   |   |   | X |  |      |
| 00465 | B8GZP6 | UDP-galactopyranose mutase                                            |                | X | 3 | 5 | / | X |  |      |
| 00466 | B8GZP7 | Glycosyltransferase                                                   | 2.7            |   |   |   |   |   |  |      |
| 00496 | B8GZS7 | Threonine--tRNA ligase                                                | <i>ΔcccnoX</i> |   |   |   |   | X |  | II   |
| 00505 | B8GZT6 | Ubiquinol-cytochrome c reductase iron-sulfur subunit                  |                | X | 5 | / | 6 |   |  |      |
| 00506 | B8GZT7 | Cytochrome b                                                          |                | X | 2 | 3 | / |   |  |      |
| 00515 | B8GZU6 | 5-methyltetrahydropteroyltriglutamate--homocysteine methyltransferase |                | X | 3 | 5 | / |   |  |      |
| 00518 | B8GZU9 | 50S ribosomal protein L25                                             |                | X | 4 | 7 | / |   |  |      |
| 00520 | B8GZV1 | Ribose-phosphate pyrophosphokinase                                    |                | X | 3 | 3 | / |   |  | II X |
| 00536 | B8GZW7 | DNA-directed RNA polymerase subunit beta                              | 3.5            |   |   |   |   | X |  | II   |
| 00537 | B8GZW8 | DNA-directed RNA polymerase beta' subunit                             | 3.6            | X | 1 | 1 | / |   |  | II   |
| 00544 | B8GZX5 | Acetyl-CoA acetyltransferase                                          |                | X | 4 | / | 8 |   |  |      |
| 02566 | B8H023 | Membrane alanine aminopeptidase                                       |                | X | 1 | / | 5 |   |  |      |
| 02575 | B8H032 | Putative cytosolic protein                                            | 2.6            |   |   |   |   |   |  |      |
| 02596 | B8H053 | 30S ribosomal protein S4                                              |                | X | 8 | 8 | / |   |  |      |
| 02607 | B8H064 | Isocitrate dehydrogenase [NADP]                                       |                | X | 1 | 1 | / | X |  | X    |
| 02612 | B8H069 | Alanine--tRNA ligase                                                  |                | X | 1 | / | 5 | X |  |      |

|       |        |                                                                     |                |   |   |   |   |   |     |   |
|-------|--------|---------------------------------------------------------------------|----------------|---|---|---|---|---|-----|---|
| 02619 | B8H076 | Stomatin/prohibitin-related protein                                 | 4              |   |   |   |   |   |     |   |
| 02657 | B8H0B4 | Putative uncharacterized protein                                    |                | X | 3 | 5 | / |   |     |   |
| 00618 | B8H0I4 | N-succinylglutamate 5-semialdehyde dehydrogenase                    |                | X | 1 | 1 | / |   |     |   |
| 00656 | B8H0M2 | Type I restriction-modification system methylation subunit          |                | X | 3 | / | 6 |   |     |   |
| 02759 | B8H0Z6 | Methionine aminopeptidase                                           |                | X | 3 | 5 | / |   |     |   |
| 00764 | B8H1A6 | Electron transfer flavoprotein beta-subunit                         |                | X | 3 | 7 | / |   |     |   |
| 00778 | B8H1C0 | GTP-binding protein TypA/BipA                                       | 4.7            | X | 2 | 3 | / | X | II  |   |
| 00801 | B8H1E3 | Cytochrome bd-type quinol oxidase, subunit 2 cydB                   |                | X | 3 | 6 | / | X |     |   |
| 00846 | B8H1X2 | Proline dehydrogenase/delta-1-pyrroline-5-carboxylate dehydrogenase |                | X | 1 | 6 | / |   |     |   |
| 00863 | B8H1Y9 | Xylonolactonase xylC                                                |                | X | 2 | 3 | / |   |     |   |
| 00893 | B8H219 | Putative transcriptional regulatory protein                         | <i>ΔcccnOX</i> |   |   |   |   |   |     |   |
| 03040 | B8H2I7 | Outer membrane pilus secretion channel cpaC                         |                | X | 6 | / | 2 |   |     |   |
| 00938 | B8H264 | Acetyl-CoA acetyltransferase                                        |                | X | 3 | 7 | / |   |     |   |
| 02979 | B8H2C6 | Cysteine desulphydrase/selenocysteine lyase                         |                | X | 1 | 1 | 1 | X | III | X |
| 02981 | B8H2C8 | Transcriptional regulator, AsnC family                              |                | X | 6 | 8 | / |   |     |   |
| 02994 | B8H2E1 | Carbamoyl-phosphate synthase large chain                            | <i>ΔcccnOX</i> |   |   |   |   |   |     |   |
| 03059 | B8H2K6 | Putative membrane spanning protein                                  |                | X | 6 | 1 | / |   |     |   |
| 03090 | B8H2N7 | Acetyl-coenzyme A carboxylase carboxyl transferase subunit alpha    | <i>ΔcccnOX</i> |   |   |   |   | X | II  |   |
| 01010 | B8H2S1 | Histidine ammonia-lyase                                             | <i>ΔcccnOX</i> |   |   |   |   |   |     |   |
| 01029 | B8H2U0 | Alpha-L-rhamnosidase                                                |                | X | / | 3 | 8 |   |     |   |
| 01087 | B8H2Z8 | Putative uncharacterized protein                                    |                | X | 6 | / | 5 |   |     |   |
| 01095 | B8H306 | Phenylalanine--tRNA ligase beta subunit                             | 3              |   |   |   |   | X |     |   |
| 03108 | B8H336 | TonB-dependent outer membrane receptor                              |                | X | / | 3 | 1 |   |     |   |

|       |        |                                                            |               |   |   |   |   |   |     |   |
|-------|--------|------------------------------------------------------------|---------------|---|---|---|---|---|-----|---|
| 03162 | B8H390 | Arginine biosynthesis bifunctional protein ArgJ            |               | X | 3 | 1 | / |   |     |   |
| 01172 | B8H3L8 | Putative uncharacterized protein                           |               | X | 5 | 1 | / |   |     |   |
| 01298 | B8H413 | Elongation factor Tu                                       |               | X | 1 | 7 | 8 |   | ns  |   |
| 03358 | B8H468 | Glyceraldehyde 3-phosphate dehydrogenase                   |               | X | 3 | 5 | / |   | I   | X |
| 01253 | B8H481 | Dihydrodipicolinate synthase                               |               | X | 2 | / | 8 | X | III |   |
| 01306 | B8H4D4 | 50S ribosomal protein L3                                   |               | X | 2 | 5 | / | X |     |   |
| 01309 | B8H4D7 | 50S ribosomal protein L2                                   |               | X | 2 | 3 | / |   | ns  | X |
| 01312 | B8H4E0 | 30S ribosomal protein S3                                   |               | X | 3 | 6 | 6 | X | ns  |   |
| 01320 | B8H4E8 | 30S ribosomal protein S8                                   |               | X | 7 | / | 5 |   |     |   |
| 01328 | B8H4F6 | 30S ribosomal protein S13                                  |               | X | 8 | / | 5 |   |     | X |
| 01330 | B8H4F8 | DNA-directed RNA polymerase subunit alpha                  |               | X | 3 | 5 | / | X | I   |   |
| 03360 | B8H4K0 | Fructose-bisphosphate aldolase                             | 3             |   |   |   |   |   | III | X |
| 03371 | B8H4L2 | Bacterioferritin                                           | <i>ΔccnoX</i> |   |   |   |   |   |     |   |
| 03422 | B8H4R3 | Oligoendopeptidase F                                       |               | X | 2 | 2 | / |   |     |   |
| 03462 | B8H4V3 | Probable glycine dehydrogenase [decarboxylating] subunit 2 |               | X | 1 | 7 | / |   |     |   |
| 03467 | B8H4V8 | Putative uncharacterized protein                           |               | X | 2 | / | 1 |   |     |   |
| 01381 | B8H4Z4 | Valine--tRNA ligase                                        |               | X | 3 | 4 | / | X |     |   |
| 01406 | B8H519 | Putative metal-dependent hydrolase                         | 3.1           |   |   |   |   |   |     |   |
| 01419 | B8H532 | Serine hydroxymethyltransferase                            |               | X | 1 | 1 | / |   | I   | X |
| 01427 | B8H540 | Lipoprotein, SmpA/OmlA family                              | 3             |   |   |   |   |   |     |   |
| 01440 | B8H553 | 50S ribosomal protein L13                                  |               | X | 6 | / | 6 | X |     |   |
| 03557 | B8H5H7 | Putative uncharacterized protein                           |               | X | 4 | / | 4 |   |     |   |
| 03558 | B8H5H8 | ATP synthase epsilon chain                                 | 4             |   |   |   |   | X |     |   |
| 03560 | B8H5I0 | ATP synthase subunit beta                                  | 2.5           | X | 3 | 3 | / | X |     | X |
| 03562 | B8H5I2 | ATP synthase subunit alpha                                 | 2.1           | X | 1 | 3 | / | X |     | X |
| 03563 | B8H5I3 | ATP synthase subunit delta                                 | 2.1           |   |   |   |   |   |     |   |
| 01552 | B8H5U9 | Polar localization protein tipN                            | 2.8           |   |   |   |   |   |     |   |
| 01603 | B8H600 | Aspartate aminotransferase                                 |               | X | 3 | 5 | / | X |     |   |

|       |        |                                                 |               |   |   |   |   |   |     |
|-------|--------|-------------------------------------------------|---------------|---|---|---|---|---|-----|
| 01606 | B8H603 | Soj/ParA-related ATPase protein                 |               | X | 4 | / | 1 |   |     |
| 01612 | B8H609 | Rod shape-determining protein mreB              | 2.2           |   |   |   |   | X | X   |
| 03643 | B8H647 | Succinate dehydrogenase membrane anchor subunit |               | X | 3 | / | 3 |   |     |
| 03681 | B8H685 | ABC transporter ATP-binding protein             | <i>ΔccnoX</i> |   |   |   |   |   |     |
| 03677 | B8H681 | CoA-transferase family III protein              |               | X | 6 | / | 6 |   |     |
| 03683 | B8H687 | Maleylpyruvate isomerase                        |               | X | 4 | / | 3 |   |     |
| 03689 | B8H693 | Alanine dehydrogenase                           |               | X | 3 | 6 | / |   |     |
| 03695 | B8H699 | Aldehyde dehydrogenase                          |               | X | 3 | / | 3 |   | III |
| 03711 | B8H6B5 | Ribosome-associated factor Y                    |               | X | 3 | 7 | / |   |     |

- 1 Calloni, G. *et al.* DnaK functions as a central hub in the E. coli chaperone network. *Cell Rep* **1**, 251-264, doi:10.1016/j.celrep.2011.12.007 (2012).
- 2 Kerner, M. J. *et al.* Proteome-wide analysis of chaperonin-dependent protein folding in Escherichia coli. *Cell* **122**, 209-220, doi:10.1016/j.cell.2005.05.028 (2005).
- 3 Arts, I. S., Vertommen, D., Baldin, F., Laloux, G. & Collet, J. F. Comprehensively Characterizing the Thioredoxin Interactome In Vivo Highlights the Central Role Played by This Ubiquitous Oxidoreductase in Redox Control. *Mol Cell Proteomics* **15**, 2125-2140, doi:10.1074/mcp.M115.056440 (2016).
