# Supplementary material for: The Chaperone and Redox Properties of CnoX Chaperedoxins Are Tailored to the Proteostatic Needs of Bacterial Species
Source: PubMed Central journal article supplement (PMC6282202; doi:10.1128/mbio.01541-18), 2018-11-27
Supplement: mbo006184194st2.pdf [file mbo006184194st2.pdf]

**Table S2- Strains and plasmids**

| <b>Strains</b> | <b>Features or relevant genotype</b>      | <b>Source and notes</b> |
|----------------|-------------------------------------------|-------------------------|
| MG1655         | WT <i>E. coli</i>                         | From Jim Bardwell       |
| JN17           | CB15N                                     | From Xavier De Bolle    |
| CG69           | CB15N <i>ybbN::tetRA</i>                  | This study              |
| CG126          | CG69 pBXMCS2- <i>CcybbNcxa</i>            | This study              |
| CG129          | CB15N <i>ybbN::ybbN-mCherry</i> (pCHYC-2) | This study              |
| FB18           | CB15N pBXMCS4- <i>CcybbN</i>              | This study              |
| FB44           | CB15N <i>Dtrx1</i> pBXMCS4- <i>CcybbN</i> | This study              |
| CG197          | BL21 pET22b- <i>CcybbN</i> (no tag)       | This study              |
| CG56           | BL21 pET23a- <i>CctrxR</i> (HisTag)       | This study              |
| CG196          | BL21 pET22b- <i>CcdnaK</i>                | This study              |
| CG190          | BL21 pET22b- <i>CcdnaJ</i>                | This study              |
| CG193          | BL21 pET22b- <i>CcgrpE</i>                | This study              |
| CG189          | BL21 pET22b- <i>CcgroEL</i>               | This study              |
| CG177          | BL21 pET22b- <i>CcgroES</i>               | This study              |
